# Supplementary material
Source: publisher site journal article supplement (https://www.spandidos-publications.com/5093/downloadSupplementary)
Supplement: Supplementary file 1 [file downloadSupplementary]

Table SI. Search strategy

| Search number | Query                                                                    | Search Details                                                                                                                                                                                                                                                                                                                                                                                                                                                                                                                                                                            |
|---------------|--------------------------------------------------------------------------|-------------------------------------------------------------------------------------------------------------------------------------------------------------------------------------------------------------------------------------------------------------------------------------------------------------------------------------------------------------------------------------------------------------------------------------------------------------------------------------------------------------------------------------------------------------------------------------------|
| 1             | (((sleep apnea) OR (OSA)) OR (sleep breathing)) AND (Pulmonary embolism) | ("sleep apnoea"[All Fields] OR "sleep apnea syndromes"[MeSH Terms] OR ("sleep"[All Fields] AND "apnea"[All Fields] AND "syndromes"[All Fields]) OR "sleep apnea syndromes"[All Fields] OR ("sleep"[All Fields] AND "apnea"[All Fields]) OR "sleep apnea"[All Fields] OR "OSA"[All Fields] OR ("sleep breath"[Journal] OR ("sleep"[All Fields] AND "breathing"[All Fields]) OR "sleep breathing"[All Fields])) AND ("pulmonary embolism"[MeSH Terms] OR ("pulmonary"[All Fields] AND "embolism"[All Fields]) OR "pulmonary embolism"[All Fields])                                          |
| 2             | (((sleep apnea) OR (OSA)) OR (sleep breathing)) AND (Thromboembolism)    | ("sleep apnoea"[All Fields] OR "sleep apnea syndromes"[MeSH Terms] OR ("sleep"[All Fields] AND "apnea"[All Fields] AND "syndromes"[All Fields]) OR "sleep apnea syndromes"[All Fields] OR ("sleep"[All Fields] AND "apnea"[All Fields]) OR "sleep apnea"[All Fields] OR "OSA"[All Fields] OR ("sleep breath"[Journal] OR ("sleep"[All Fields] AND "breathing"[All Fields]) OR "sleep breathing"[All Fields])) AND ("thromboembolic"[All Fields] OR "thromboembolism"[MeSH Terms] OR "thromboembolism"[All Fields] OR "thromboembolisms"[All Fields] OR "thromboembolization"[All Fields]) |
| 3             | (((sleep apnea) OR (OSA)) OR (sleep breathing)) AND (venous thrombosis)  | ("sleep apnoea"[All Fields] OR "sleep apnea syndromes"[MeSH Terms] OR ("sleep"[All Fields] AND "apnea"[All Fields] AND "syndromes"[All Fields]) OR "sleep apnea syndromes"[All Fields] OR ("sleep"[All Fields] AND "apnea"[All Fields]) OR "sleep apnea"[All Fields] OR "OSA"[All Fields] OR ("sleep breath"[Journal] OR ("sleep"[All Fields] AND "breathing"[All Fields]) OR "sleep breathing"[All Fields])) AND ("venous thrombosis"[MeSH Terms] OR ("venous"[All Fields] AND "thrombosis"[All Fields]) OR "venous thrombosis"[All Fields])                                             |
| 4             | (((sleep apnea) OR (OSA)) OR (sleep breathing)) AND (VTE)                | ("sleep apnoea"[All Fields] OR "sleep apnea syndromes"[MeSH Terms] OR ("sleep"[All Fields] AND "apnea"[All Fields] AND "syndromes"[All Fields]) OR "sleep apnea syndromes"[All Fields] OR ("sleep"[All Fields] AND "apnea"[All Fields]) OR "sleep apnea"[All Fields] OR "OSA"[All Fields] OR ("sleep breath"[Journal] OR ("sleep"[All Fields] AND "breathing"[All Fields]) OR "sleep breathing"[All Fields])) AND "VTE"[All Fields]                                                                                                                                                       |
